# Supplementary material for: Electrooxidation of 5-hydroxymethylfurfural and electroreduction of nitrobenzene by hollow CoFeP cubes/rGO/Ni foam
Source: Royal Society of Chemistry journal article supplement (doi:10.1039/d5ta03005f), 2025-01-01
Supplement: d5ta03005f1.pdf [file d5ta03005f1.pdf]

## Electrooxidation of 5-Hydroxymethylfurfural and Electroreduction of Nitrobenzene by Hollow CoFeP Cubes/rGO/Ni Foam

Xinheng Li,<sup>a,d,1,\*</sup> Lei Qi,<sup>b,d,1</sup>, Wanfei Li,<sup>c</sup> Mei Wang,<sup>d</sup> Jianbin Xue,<sup>d</sup> Muzi Chen,<sup>e</sup> Guixin Wang<sup>f</sup>

<sup>a</sup> College of Chemistry and Environmental Engineering, Sichuan University of Science and Engineering, Zigong 643000, Sichuan Province, China.

<sup>b</sup> Gansu Yinguang Juyin Chemical Engineering Corp., Baiyin 730900, Gansu Province, China.

<sup>c</sup> Suzhou Key Laboratory for Nanophotonic and Nanoelectronic Materials and Its Devices, School of Materials Science and Engineering, Suzhou University of Science and Technology, Suzhou 215009, Jiangsu Province, China

<sup>d</sup> The State Key Laboratory for Oxo Synthesis and Selective Oxidation, Suzhou Base of LICP, Lanzhou Institute of Chemical Physics (LICP), Chinese Academy of Sciences, Lanzhou 730000, China.

<sup>e</sup> Analysis and Testing Center, Soochow University, Suzhou 215123, Jiangsu Province, China

<sup>f</sup> School of Chemical Engineering, Sichuan University, Chengdu 610065, Sichuan Province, China

<sup>1</sup> Authors who have equal contribution to this work.

Corresponding authors: [xinhengli@suse.edu.cn](mailto:xinhengli@suse.edu.cn).

## Table of contents

|                                                                                                                                                                                                                                                                 |    |
|-----------------------------------------------------------------------------------------------------------------------------------------------------------------------------------------------------------------------------------------------------------------|----|
| <b>Figure S1.</b> Cross-section SEM images (a,b) of the as-obtained rGO/NF and CoFeP/P-rGO/NF samples .....                                                                                                                                                     | 4  |
| <b>Figure S2.</b> (a) i-t curves of HMFOR; (b ,c) UV-Vis and HPLC chromatograms corresponding i-t process; (d) Possible reaction pathway for electrochemical HMF oxidation to FDCA in alkaline solution.....                                                    | 5  |
| <b>Figure S3.</b> LSV curve of CoFeP/P-rGO/NF acted as a bifunctional catalyst for HMFOR and HER in a dual electrode system without iR compensation.....                                                                                                        | 6  |
| <b>Figure S4.</b> HPLC chromatograms (a,b,c) of NB electroreduction to produce aniline and azobenzene by the as-obtained CoFeP/P-rGO/NF samples.....                                                                                                            | 8  |
| <b>Figure S5.</b> Control experiments of OER (a,b,c) and HER (d,e,f) of the as-obtained CoFeP/P-rGO/NF samples. (a,d) LSV curves; (b,e) Tafel plots; (c,f) EIS plots and (g) I-t curves of CoFeP/P-rGO/NF at 1.5 V vs. RHE and -0.19 V vs. RHE in 1 M KOH ..... | 9  |
| <b>Figure S6.</b> The GC-MS analysis of the products obtained through electrocatalytic reduction for 1 h at -0.2V revealed that the primary product was aniline (AB), along with unreacted NB.....                                                              | 10 |
| <b>Figure S7.</b> The GC-MS analysis of the product obtained through electrocatalytic reduction for 2 h at -0.2V revealed a gradual decrease in the peak intensity of NB....                                                                                    | 11 |
| <b>Figure S8.</b> The GC-MS analysis of the product obtained through electrocatalytic reduction for 3 h at -0.2V.....                                                                                                                                           | 12 |
| <b>Figure S9.</b> The GC-MS analysis of the product obtained through electrocatalytic reduction for 4 h at -0.2V.....                                                                                                                                           | 13 |
| <b>Figure S10.</b> The GC-MS analysis of the product obtained through electrocatalytic reduction for 5 h at -0.2V with a low feature peak for NB.....                                                                                                           | 14 |

**Table S1.** Comparison of HMFOR performance coupled with HER between this work and recent literature in 1 M KOH + 10 mM HMF.....7

**Table S2.** Comparison of overall water splitting performance of reported bifunctional catalysts in 1 M KOH.....15

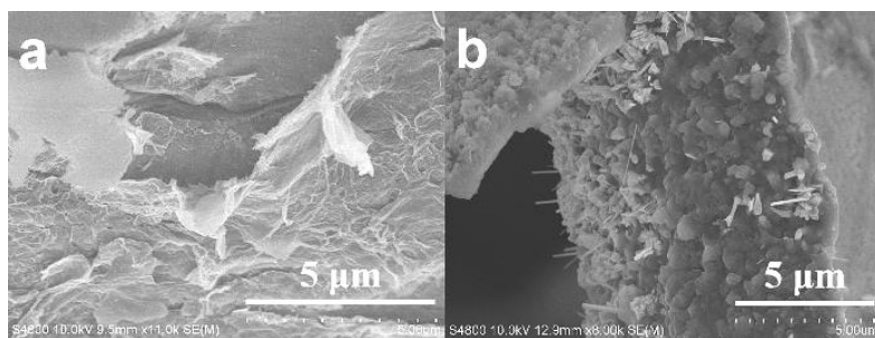

**Figure S1.** Cross-section SEM images (a, b) of the as-obtained rGO/NF and CoFeP/P-rGO/NF samples.

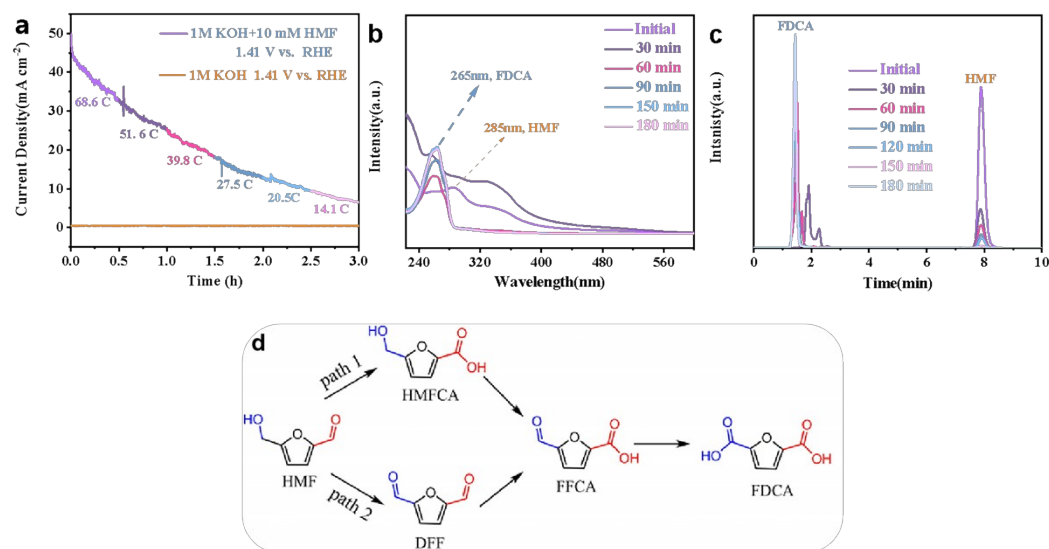

**Figure S2.** (a) i-t curves of HMFOR; (b, c) UV-Vis and HPLC chromatograms corresponding i-t process; (d) Possible reaction pathway for electrochemical HMF oxidation to FDCA in alkaline solution.

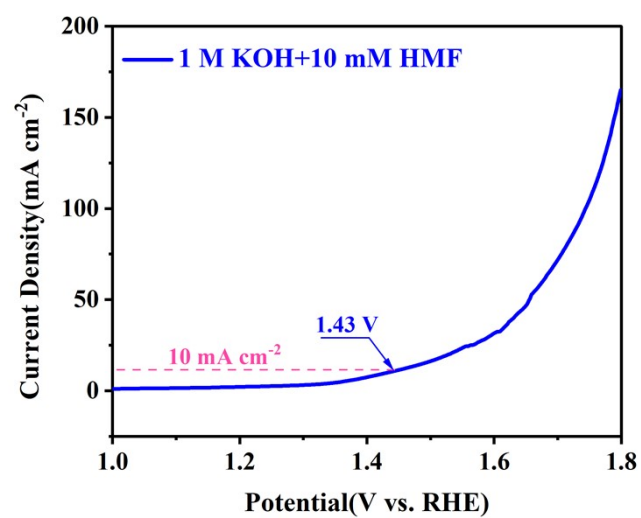

**Figure S3.** LSV curve of CoFeP/P-rGO/NF acted as a bifunctional catalyst for HMFOR and HER in a dual electrode system without iR compensation.

**Table S1.** Comparison of HMFOR performance coupled with HER between this work and recent literature in 1 M KOH + 10 mM HMF.

| Catalysts                                               | Voltage (10 mA cm <sup>-2</sup> ) | FE(%) | Ref.      |
|---------------------------------------------------------|-----------------------------------|-------|-----------|
| CoFeP/P-rGO/NF                                          | 1.43                              | 100   | This work |
| hp-Ni/NF                                                | 1.50                              | >97   | [1]       |
| NiSe@NiO <sub>x</sub>                                   | 1.50                              | >99   | [2]       |
| N-Ni <sub>3</sub> S <sub>2</sub> - MoO <sub>2</sub> /NF | ~1.50                             | 94.9  | [3]       |
| Ni <sub>3</sub> N@C/NF                                  | 1.48                              | ~98   | [4]       |
| Co-P/CF                                                 | >1.4                              | 90    | [5]       |
| CoNW/NF                                                 | 1.50                              | 95    | [6]       |

**References:**

- [1] B. You, X. Liu, X. Liu, et al. Efficient H<sub>2</sub> Evolution Coupled with Oxidative Refining of Alcohols via A Hierarchically Porous Nickel Bifunctional Electrocatalyst. *ACS Catal.* 7 (2017) 4564-4570. <https://doi.org/10.1021/acscatal.7b00876>.
- [2] L. Gao, Z. Liu, J. Ma, et al. NiSe@NiO<sub>x</sub> core-shell nanowires as a non-precious electrocatalyst for upgrading 5-hydroxymethylfurfural into 2,5-furandicarboxylic acid. *Appl. Catal. B.* 261 (2020) 118235. <https://doi.org/10.1016/j.apcatb.2019.118235>.
- [3] L. Wang, J. Cao, C. Lei, et al. Strongly Coupled 3D N-Doped MoO<sub>2</sub>/Ni<sub>3</sub>S<sub>2</sub> Hybrid for High Current Density Hydrogen Evolution Electrocatalysis and Biomass Upgrading. *ACS Appl. Mater. Inter.* 11 (2019) 27743-27750. <https://doi.org/10.1021/acsami.9b06502>.
- [4] S. Wang, N. Zhang, L. Tao, et al. Electrochemical Oxidation of 5-Hydroxymethylfurfural on Nickel Nitride/Carbon Nanosheets: Identified Pathway by in Situ Sum Frequency Generation Vibrational Spectroscopy. *Angew. Chem. Int. Ed.* 58 (2019) 15895-15903. <https://doi.org/10.1002/anie.201908722>.
- [5] N. Jiang, B. You, R. Boonstra, et al. Integrating Electrocatalytic 5-Hydroxymethylfurfural Oxidation and Hydrogen Production via Co-P-Derived Electrocatalysts. *ACS Energy Lett.* 1 (2016) 386-390. <https://doi.org/10.1021/acsenenergylett.6b00214>.
- [6] Z. Zhou, C. Chen, M. Gao, et al. In situ anchoring of a Co<sub>3</sub>O<sub>4</sub> nanowire on nickel foam: an outstanding bifunctional catalyst for energy-saving simultaneous reactions. *Green Chemistry.* 21 (2019) 6699-6706. <https://doi.org/10.1039/C9GC02880C>.

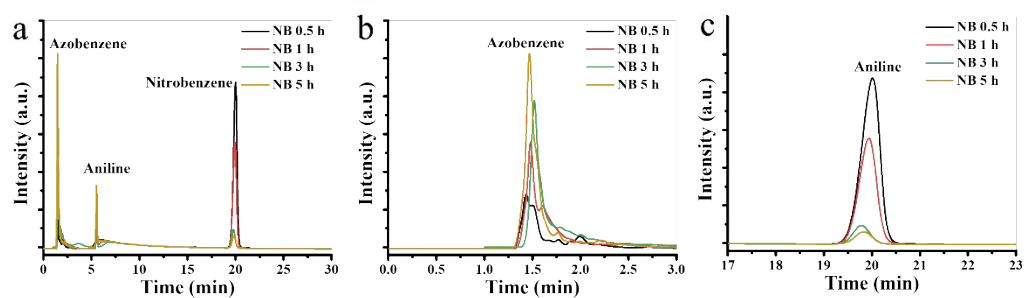

**Figure S4.** HPLC chromatograms (a,b,c) of NB electroreduction to produce aniline and azobenzene by the as-obtained CoFeP/P-rGO/NF samples.



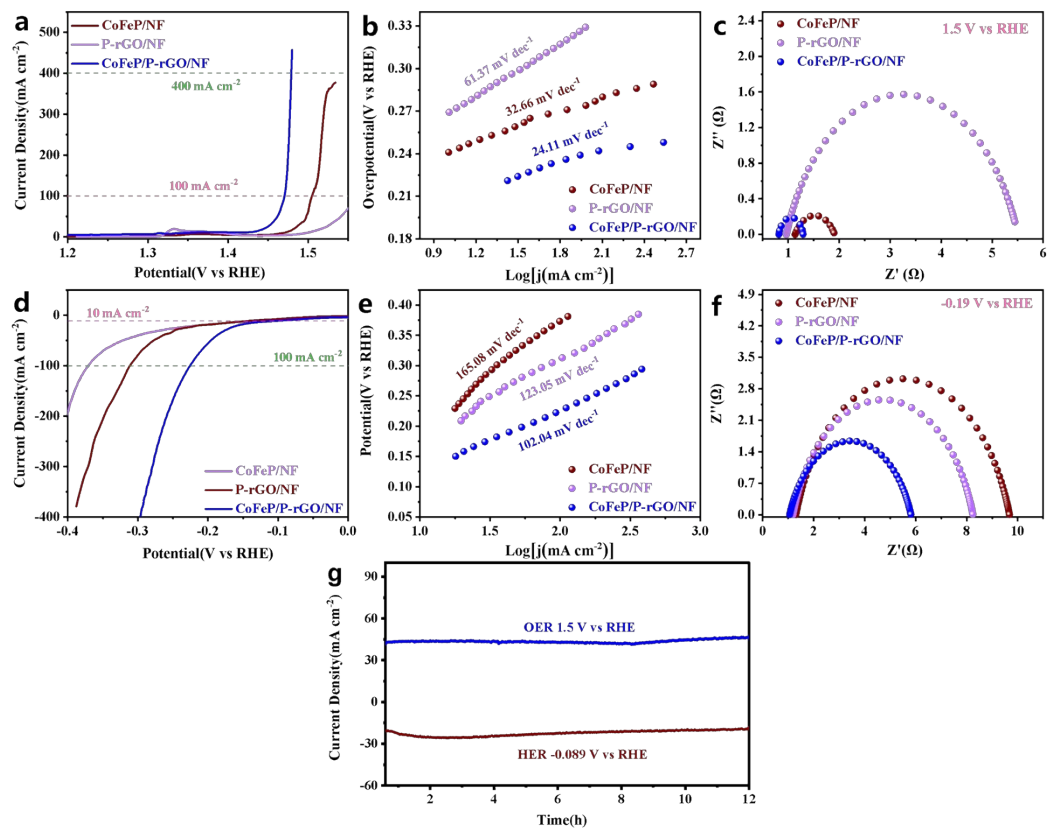

**Figure S5.** Control experiments of OER (a,b,c) and HER (d,e,f) of the as-obtained CoFeP/P-rGO/NF samples. (a,d) LSV curves; (b,e) Tafel plots; (c,f) EIS plots and (g) I-t curves of CoFeP/P-rGO/NF at 1.5 V vs. RHE and -0.19 V vs. RHE in 1 M KOH.

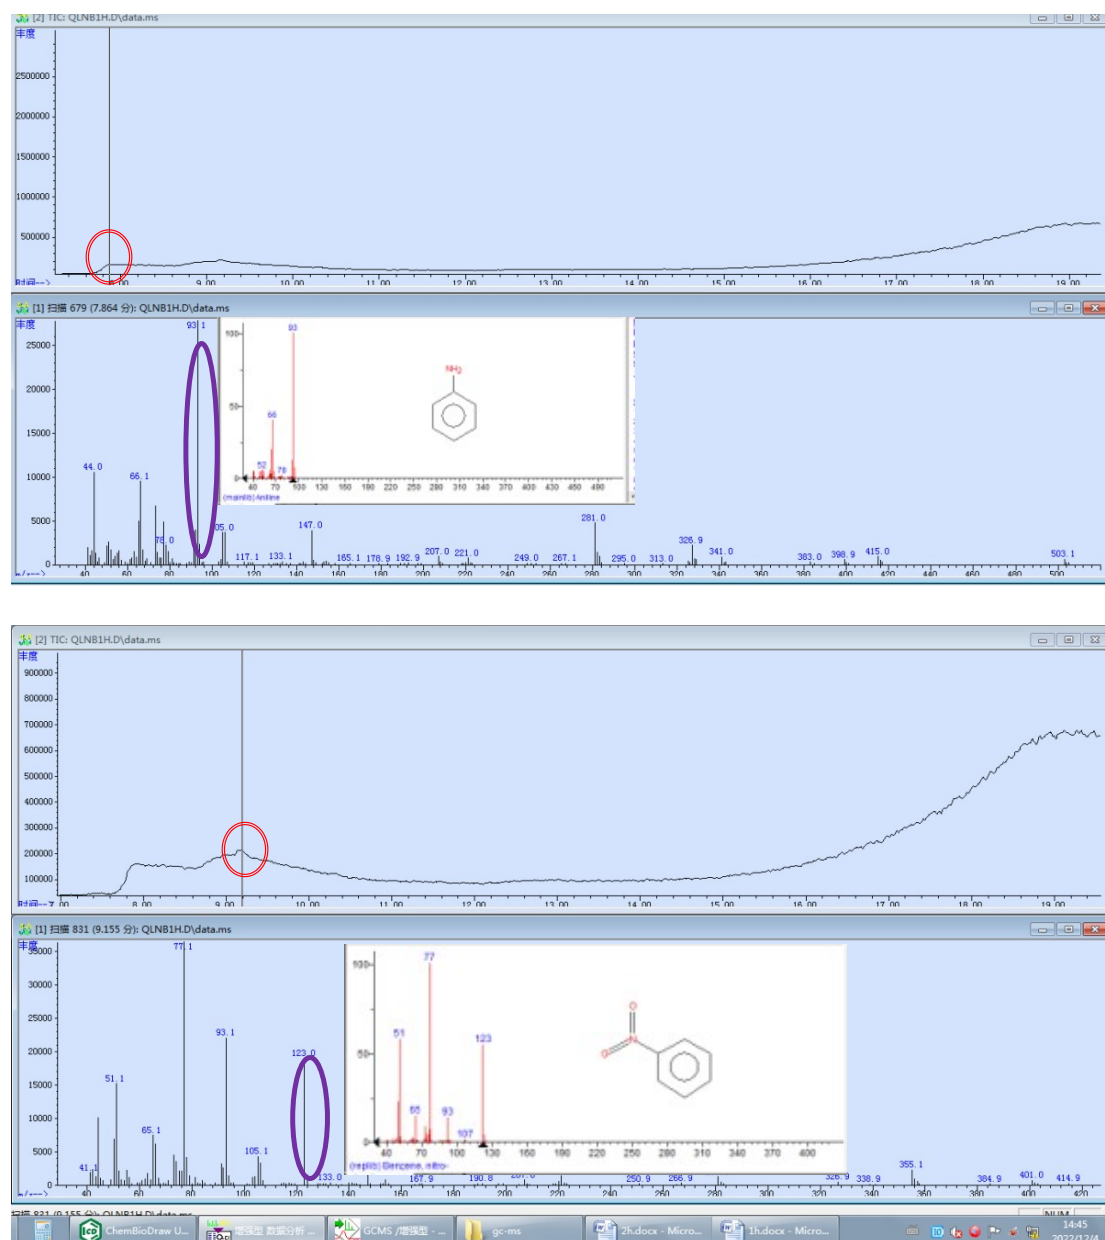

**Figure S6.** The GC-MS analysis of the products obtained through electrocatalytic reduction for 1 h at -0.2V revealed that the primary product was aniline (AB), along with unreacted NB.

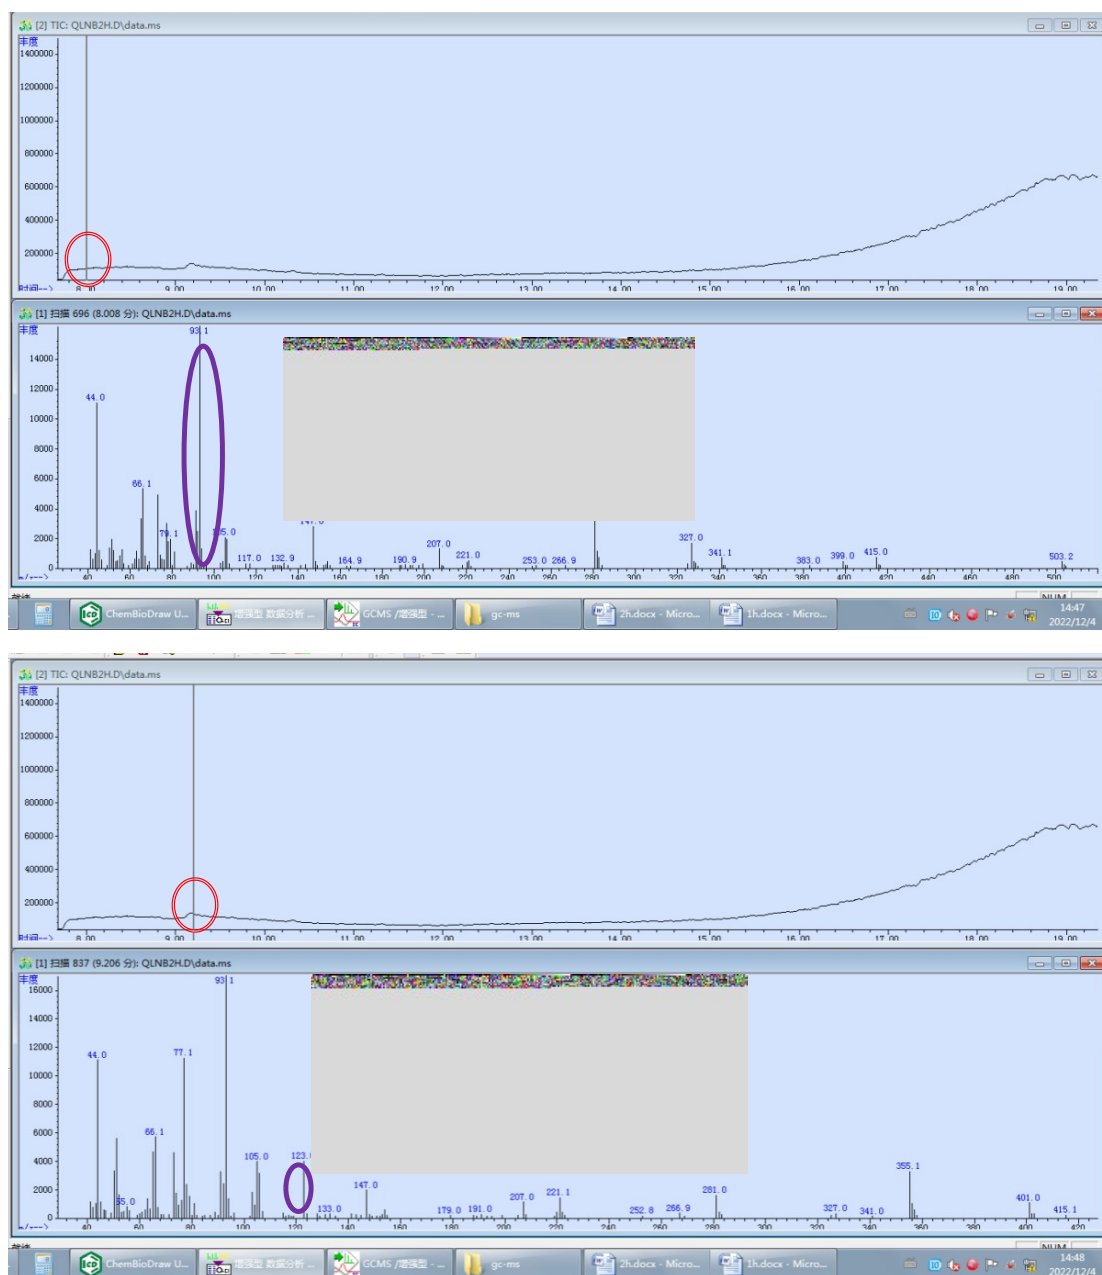

**Figure S7.** The GC-MS analysis of the product obtained through electrocatalytic reduction for 2 h at -0.2V revealed a gradual decrease in the peak intensity of NB.

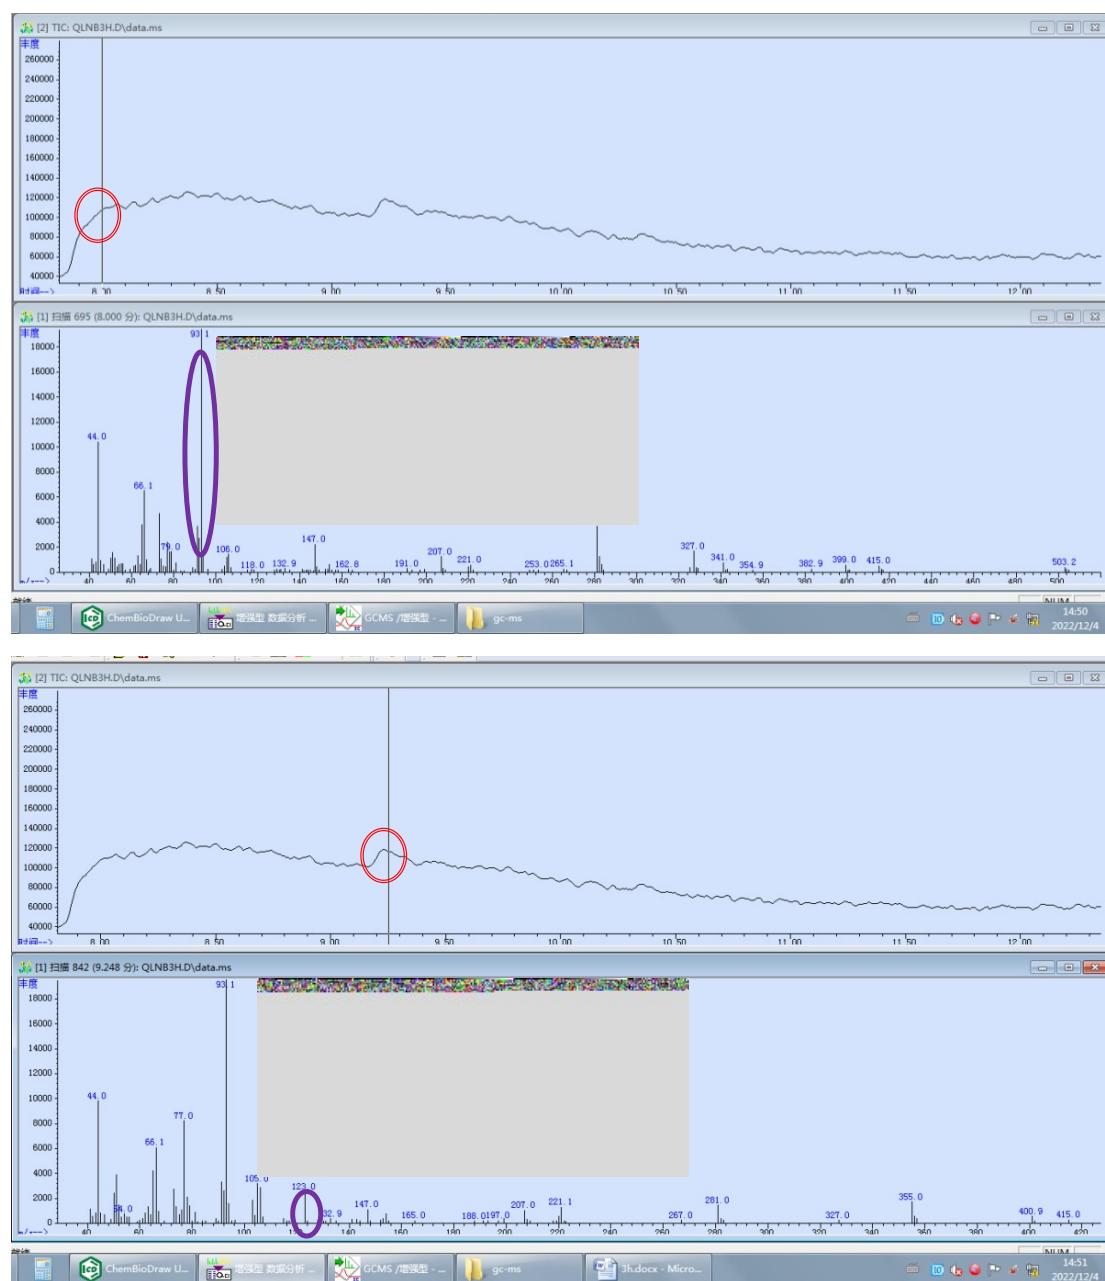

**Figure S8.** The GC-MS analysis of the product obtained through electrocatalytic reduction for 3 h at -0.2V.

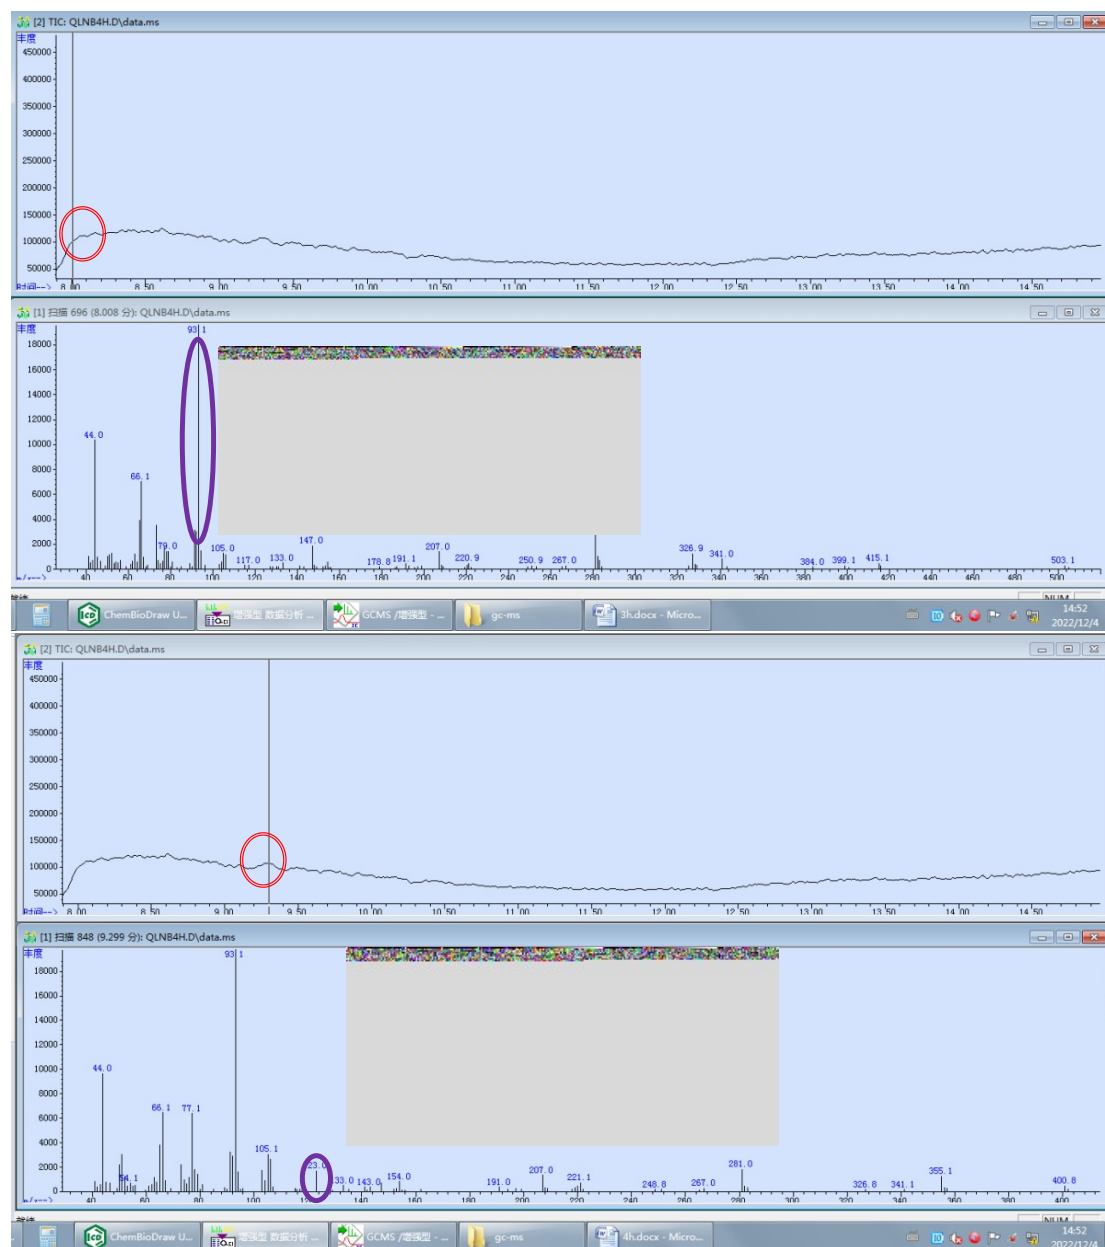

**Figure S9.** The GC-MS analysis of the product obtained through electrocatalytic reduction for 4 h at -0.2V.

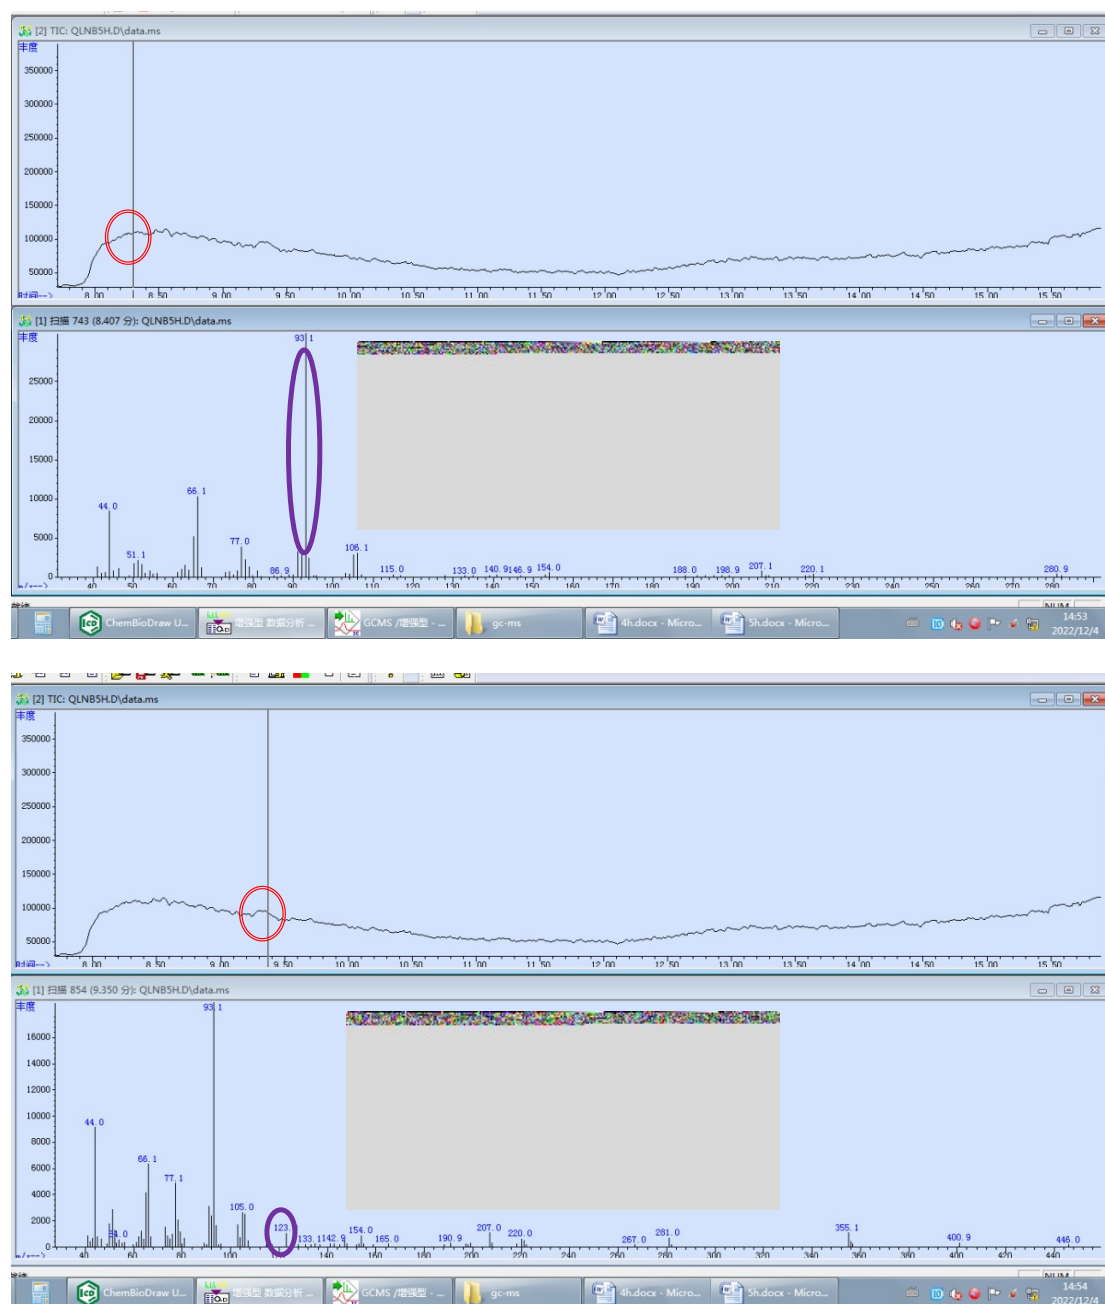

**Figure S10.** The GC-MS analysis of the product obtained through electrocatalytic reduction for 5 h at -0.2V with a low feature peak for NB.

**Table S2.** Comparison of overall water splitting performance of reported bifunctional catalysts in 1 M KOH.

| Catalysts      | Voltage (10 mA cm <sup>-2</sup> ) | Ref.      |
|----------------|-----------------------------------|-----------|
| CoFeP/P-rGO/NF | 1.48                              | This work |
| Mo-CoP/CC      | 1.56                              | [6]       |
| S:CoP@NF       | 1.62                              | [7]       |
| CoP/C          | 1.56                              | [8]       |
| CoP@NPMG       | 1.58                              | [9]       |
| CoP@3D MXene   | 1.58                              | [10]      |
| Co-P@PC-750    | 1.60                              | [11]      |
| Er-doped CoP   | 1.58                              | [12]      |
| Cr-FeNiP/NCN   | 1.5                               | [13]      |

#### References:

- [6] C. Guan, W. Xiao, H. Wu, et al. Hollow Mo-doped CoP nanoarrays for efficient overall water splitting. *Nano Energy*. 48 (2018) 73-80. <https://doi.org/10.1016/j.nanoen.2018.03.034>.
- [7] M. A. R. Anjum, M. S. Okyay, M. Kim, et al. Bifunctional sulfur-doped cobalt phosphide electrocatalyst outperforms all-noble-metal electrocatalysts in alkaline electrolyzer for overall water splitting. *Nano Energy*. 53 (2018) 286-295. <https://doi.org/10.1016/j.nanoen.2018.08.064>.
- [8] X. Li, X. Qian, Y. Xu, et al. Electrodeposited cobalt phosphides with hierarchical nanostructure on biomass carbon for bifunctional water splitting in alkaline solution. *J. Alloy. Compd.* 829 (2020) 154535. <https://doi.org/10.1016/j.jallcom.2020.154535>.
- [9] Y. Liu, Y. Zhu, J. Shen, et al. CoP nanoparticles anchored on N, P-dual-doped graphene-like carbon as a catalyst for water splitting in non-acidic media.

- Nanoscale. 10 (2018) 2603-2612. <https://doi.org/10.1039/C7NR07274K>.
- [10] L. Xiu, Z. Wang, M. Yu, et al. Aggregation-Resistant 3D MXene-Based Architecture as Efficient Bifunctional Electrocatalyst for Overall Water Splitting. ACS Nano. 12 (2018) 8017-8028. <https://doi.org/10.1021/acsnano.8b02849>.
- [11] J. Wu, D. Wang, S. Wan, et al. An Efficient Cobalt Phosphide Electrocatalyst Derived from Cobalt Phosphonate Complex for All-pH Hydrogen Evolution Reaction and Overall Water Splitting in Alkaline Solution. Small. 16 (2020) 1900550. <https://doi.org/10.1002/sml.201900550>.
- [12] G. Zhang, B. Wang B, J. Bi, et al. Constructing ultrathin CoP nanomeshes by Er-doping for highly efficient bifunctional electrocatalysts for overall water splitting. J. Mater. Chem. A. 7 (2019) 5769-5778. <https://doi.org/10.1039/C9TA00530G>.
- [13] Y. Wu, X. Tao, Y. Qing, et al. Cr-Doped FeNi-P Nanoparticles Encapsulated into N-Doped Carbon Nanotube as a Robust Bifunctional Catalyst for Efficient. Overall Water Splitting. Adv. Mater. 31 (2019) 1900178.
